# Supplementary material for: A smartphone-based double-channel fluorescence setup for immunoassay of a carcinoembryonic antigen using CuS nanoparticles for signal amplification
Source: Royal Society of Chemistry journal article supplement (doi:10.1039/c7an01988b), 2018-01-01
Supplement: c7an01988b1.pdf [file c7an01988b1.pdf]

## Electronic Supporting Information

A smartphone-based double-channel fluorescent device for immunoassay of carcinoembryonic antigen using CuS nanoparticles for signal amplification

Honghai Wang,<sup>a</sup> Yan Sun,<sup>a</sup> Weiwei Yue,<sup>a</sup> Qi Kang,<sup>\*a</sup> Huijuan Li<sup>b</sup> and Dazhong Shen<sup>\*a</sup>

<sup>a</sup> College of Chemistry, Chemical Engineering and Materials Science, Collaborative Innovation Center of Functionalized Probes for Chemical Imaging in Universities of Shandong, Key Laboratory of Molecular and Nano Probes, Ministry of Education, Shandong Provincial Key Laboratory of Clean Production of Fine Chemicals, Shandong Normal University, Jinan 250014, P. R. China

<sup>b</sup> College of Chemical and Environmental Engineering, Shandong University of Science and Technology, Qingdao, 266590, P.R.China

-----

\*Corresponding authors. Tel.: +86 0531 86180740; fax: +86 053182615258.

E-mail address: kangqi@sdnu.edu.cn (Q. Kang); dzshen@sdnu.edu.cn (D. Z. Shen).

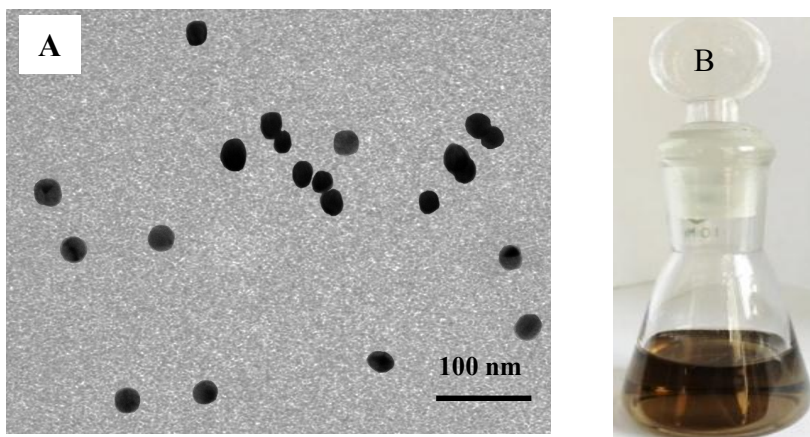

**Fig. S1.** TEM images of carboxylated CuS NPs (A). The photo of carboxylated CuS NPs suspension after being put aside for 24 hours (B).

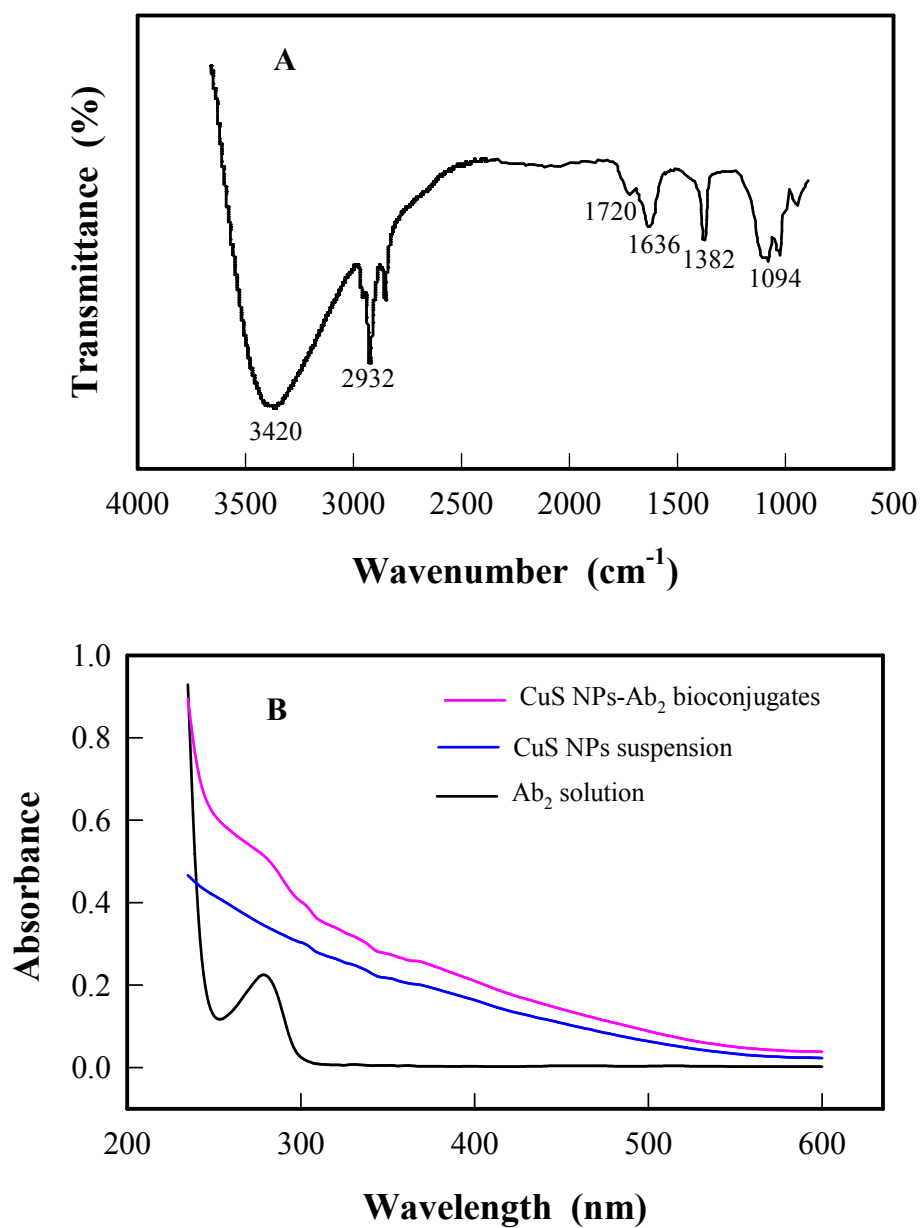

**Fig. S2.** FTIR spectrum of carboxylated CuS NPs (A). UV-Vis absorption spectra of Ab<sub>2</sub> solution, CuS NPs suspension, and CuS-Ab<sub>2</sub> bioconjugates (B).

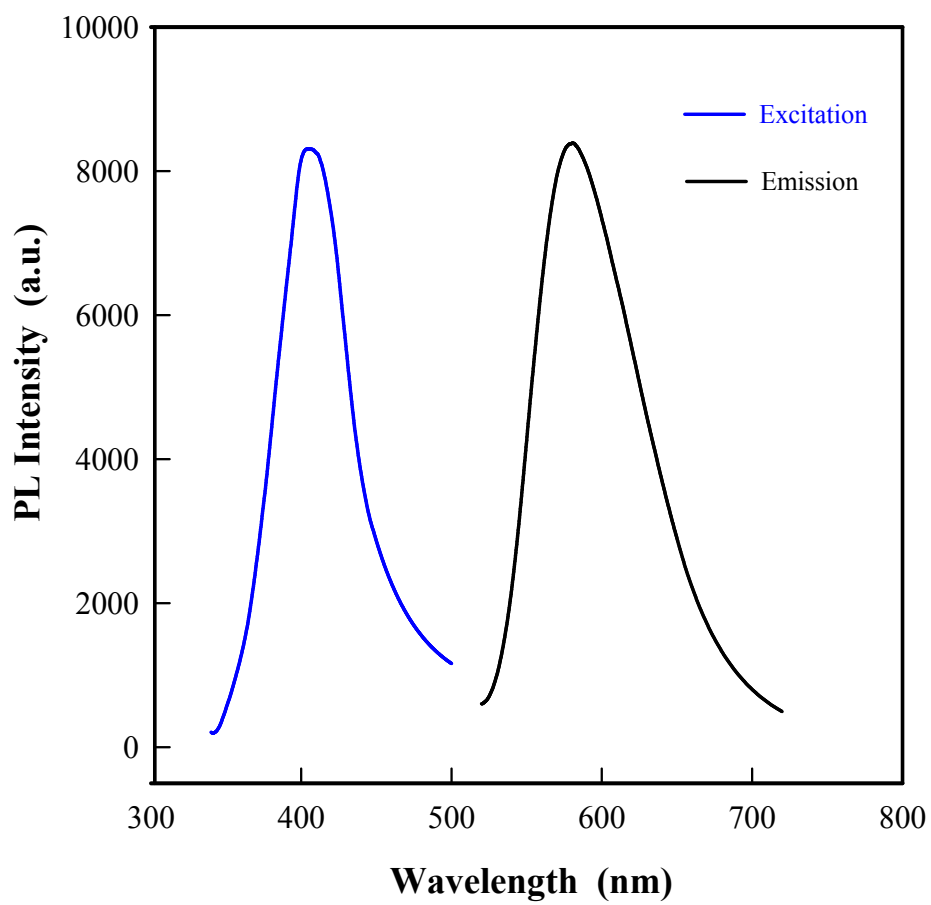

**Fig . S3** Excitation and emission spectra of DAP. Concentration of DAP was 0.4  $\mu$ M, pH=6.0.

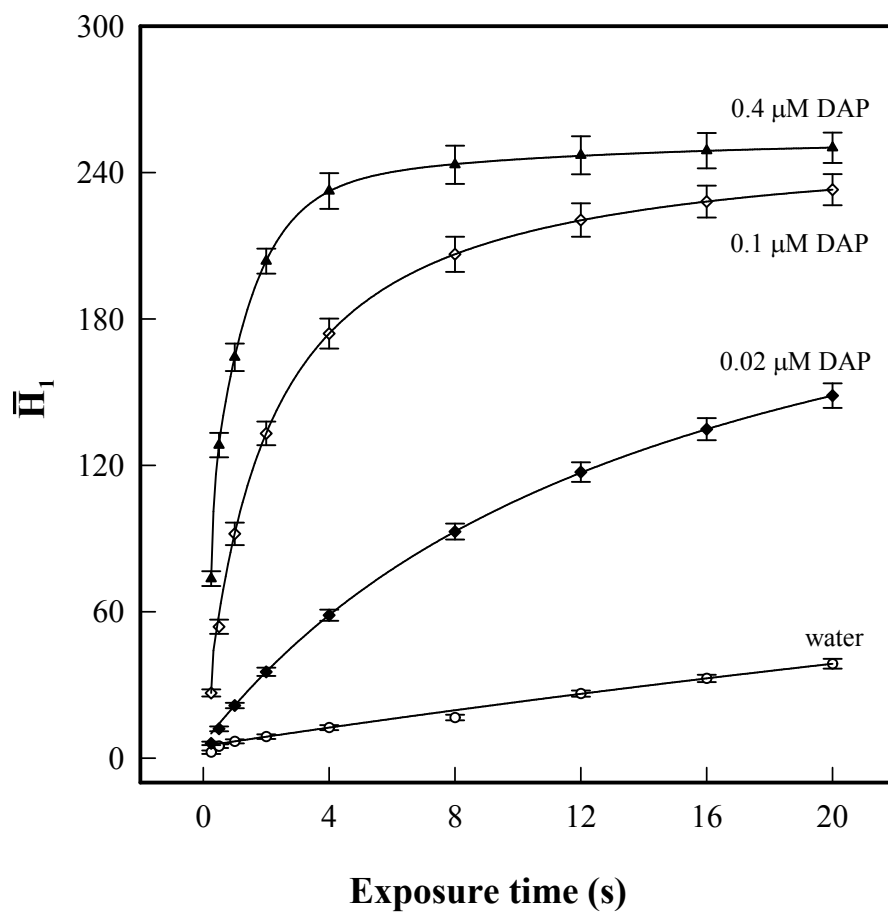

**Fig. S4** Influence of the exposure time on averaged brightness of the fluorescence images of DAP solutions (ISO = 400).

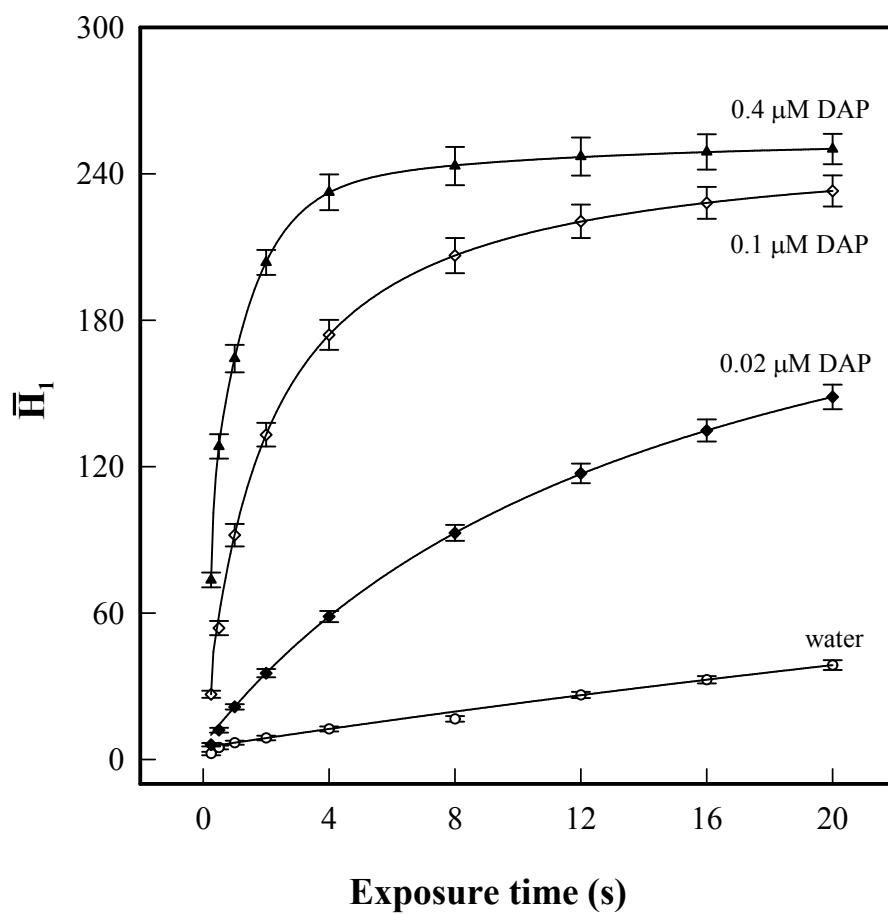

**Fig. S5** Influence of the ISO value on averaged brightness of the fluorescence images of DAP solutions (exposure time = 0.5 s)

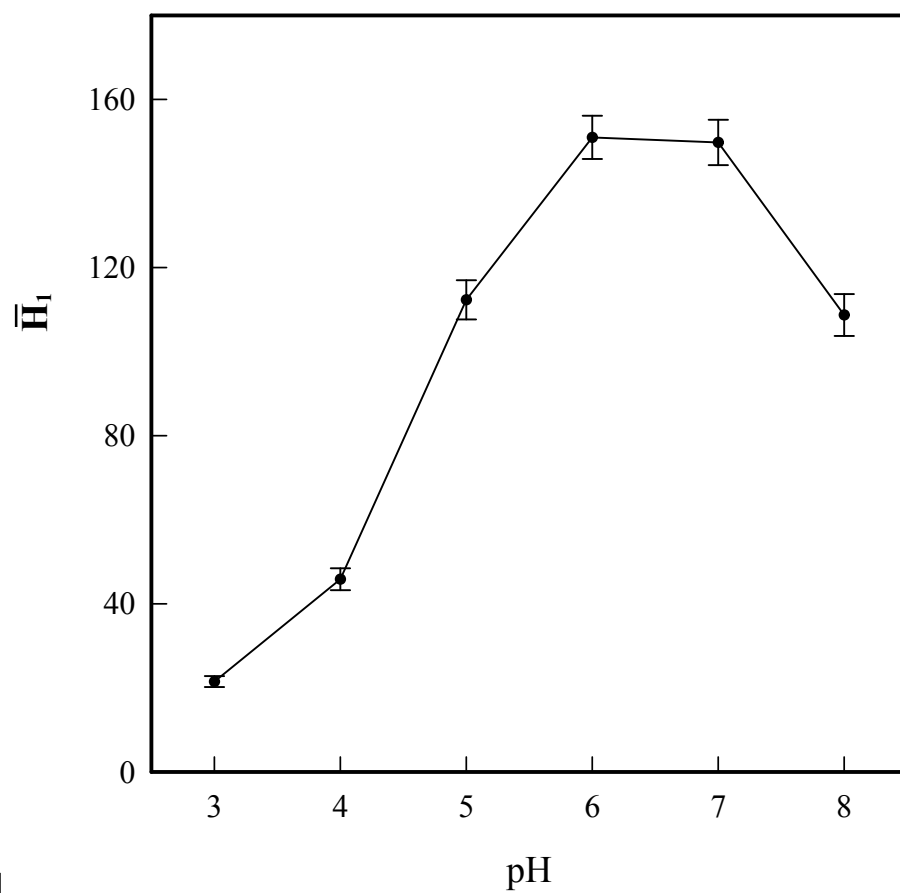

**Fig. S6** Influence of pH on the image intensity in 0.4  $\mu\text{M}$  PAD solution. Exposure time = 0.5 s, ISO = 400.

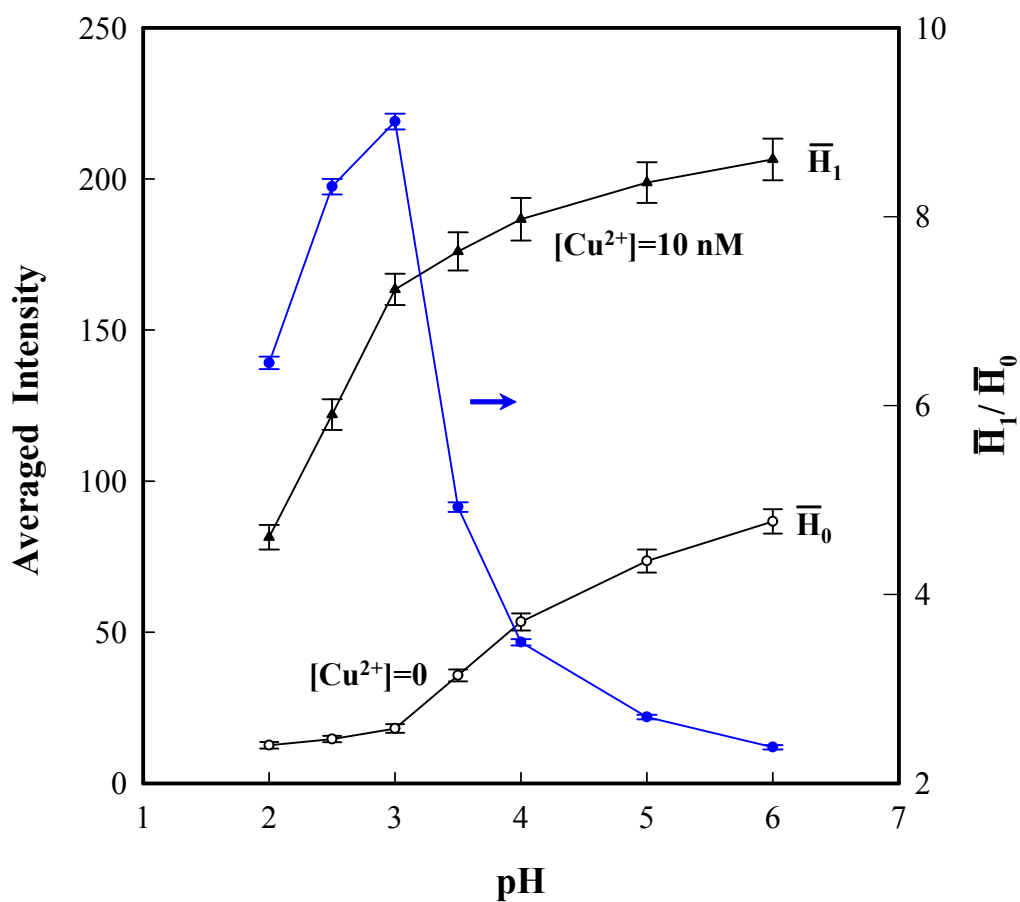

**Fig. S7** Influence of pH on the image intensity in the catalytic reaction system. Reaction conditions: Temperature = 80 °C, reaction time = 15 min, [OPD]=0.8 mM, measurement condition: pH=6; exposure time = 0.5 s, ISO=400, room temperature.



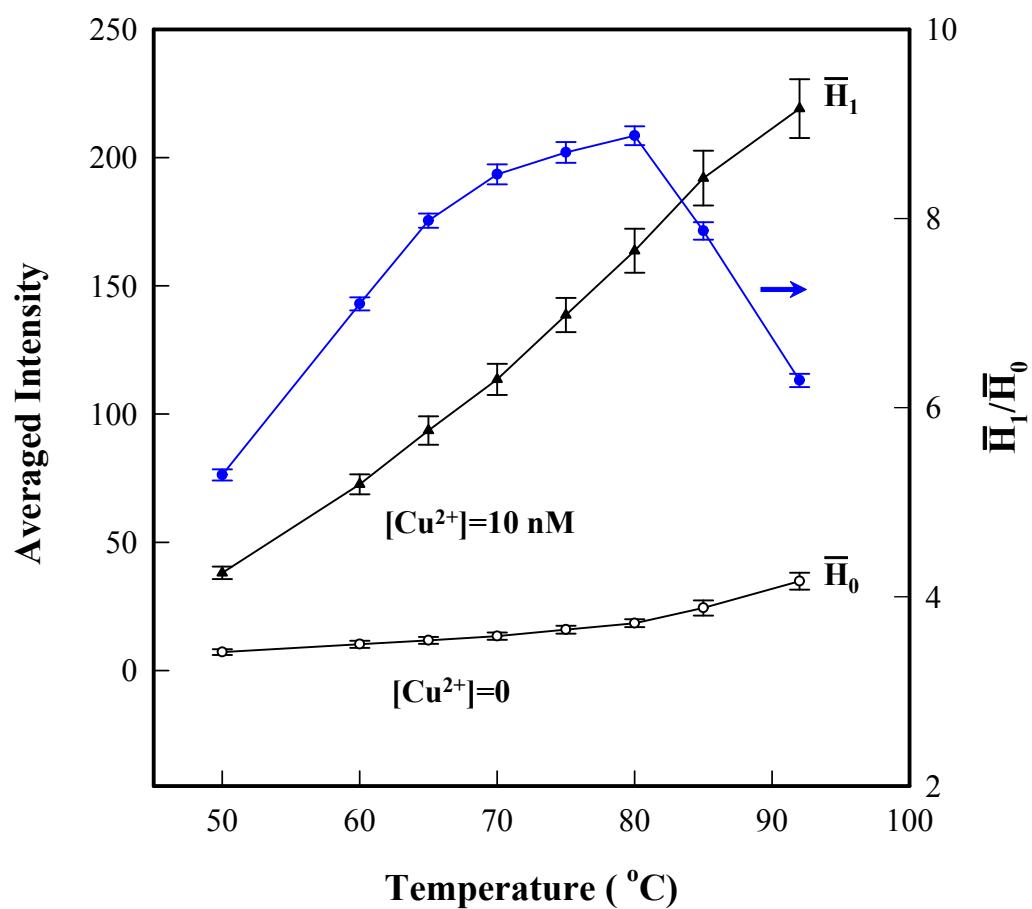

**Fig. S8** Influence of temperature on the image intensity in the catalytic reaction system. Reaction conditions: pH = 3.0, reaction time = 15 min, [OPD]=0.8 mM, measurement conditions are the same as **Fig.S7**.

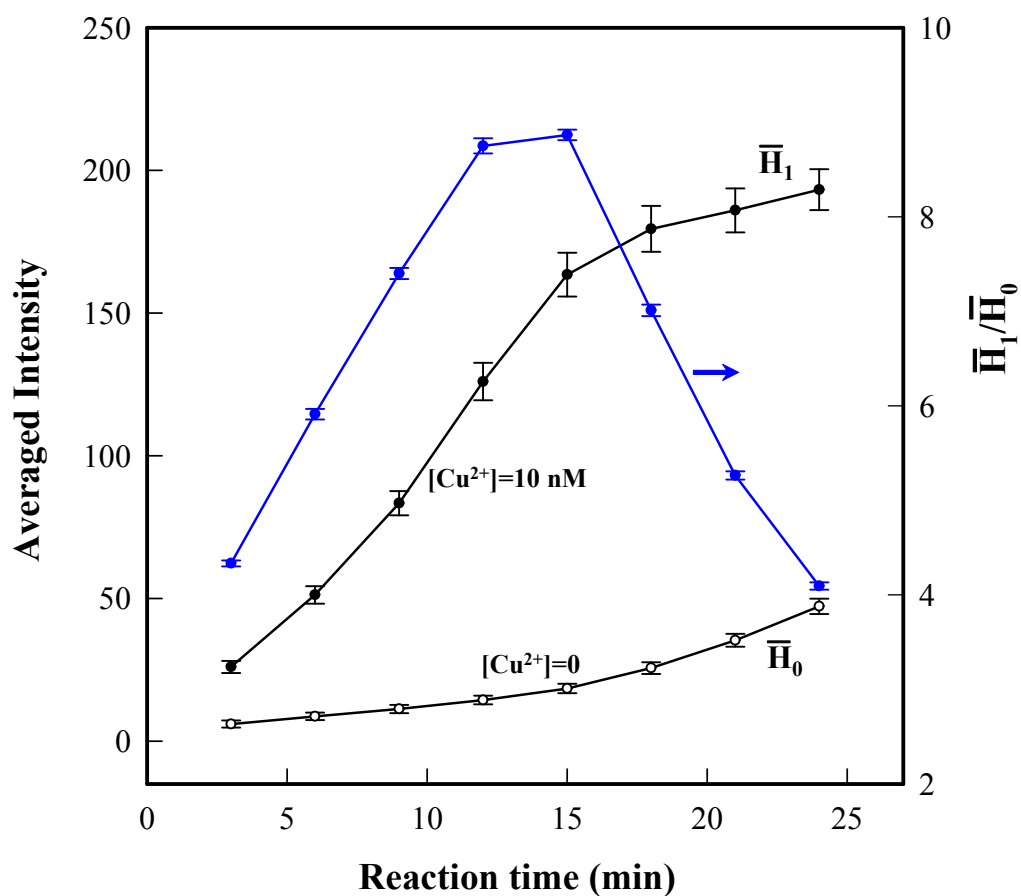

**Fig. S9** Influence of reaction time on the image intensity in the catalytic reaction system. Reaction conditions: Temperature = 80 °C, pH = 3.0, [OPD]=0.8 mM, measurement conditions are the same as **Fig.S7**.

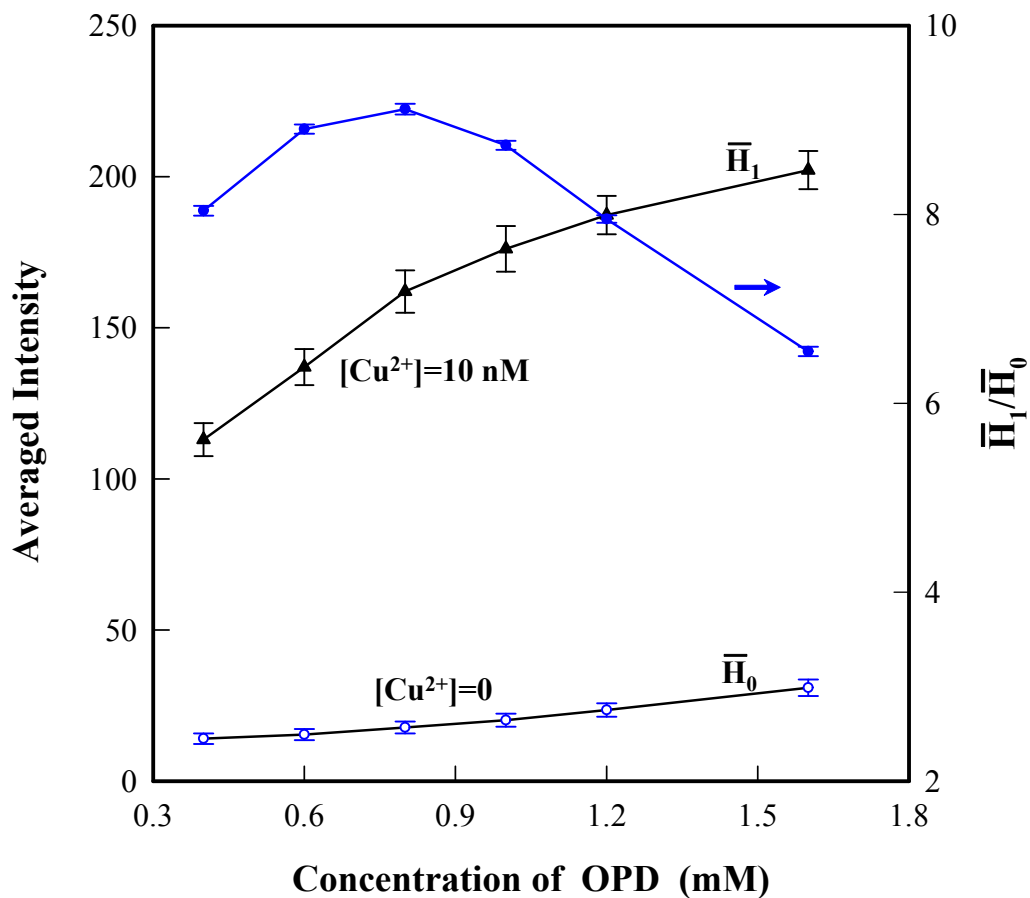

**Fig. S10** Influence of OPD concentration on the image intensity in the catalytic reaction system. Reaction conditions: Temperature = 80 °C, pH = 3.0, reaction time = 15 min, measurement conditions are the same as Fig.S7.

**Table S1.** Comparison of analytical performance of some immunoassay methods for CEA detection

| Immunoprobe *                                                                                            | Methods **                 | Linear range<br>(ng mL <sup>-1</sup> ) | LoD<br>(ng mL <sup>-1</sup> ) | Refs.        |
|----------------------------------------------------------------------------------------------------------|----------------------------|----------------------------------------|-------------------------------|--------------|
| Ab <sub>1</sub> -CEA                                                                                     | CI                         | 0.0001–10                              | 1×10 <sup>-4</sup>            | 1            |
| CEA-Ag@Au-Ab <sub>1</sub>                                                                                | DLS                        | 0.06– 50                               | 0.04                          | 2            |
| GO-Ab <sub>1</sub> -CEA-Apt.-Ag NCs-HRP                                                                  | EC                         | 0.001–10                               | 5×10 <sup>-4</sup>            | 3            |
| 3D-G-Con A- HRP-Ab <sub>1</sub> -CEA                                                                     | EC                         | 0.1–750                                | 0.09                          | 4            |
| GO-Ab <sub>1</sub> -CEA-Ab <sub>2</sub> -AuNPs/g-C <sub>3</sub> N <sub>4</sub>                           | ECL                        | 0.001 –10                              | 4×10 <sup>-4</sup>            | 5            |
| Apt.-CEA-Apt.-Ru@SiO <sub>2</sub> - Au NPs                                                               | ECL                        | 5×10 <sup>-6</sup> –0.05               | 1.5×10 <sup>-6</sup>          | 6            |
| Au NPs Ab <sub>1</sub> -CEA                                                                              | EIS                        | 0.05 –80                               | 0.001                         | 7            |
| CEA-Au@Ag-Ab <sub>1</sub>                                                                                | Fluorescence               | 0.02–0.2                               | 0.01                          | 8            |
| QBs-Ab <sub>1</sub>                                                                                      | ICTS                       | 1–100                                  | 0.04                          | 9            |
| Fe <sub>3</sub> O <sub>4</sub> -Ab <sub>1</sub> -CEA-Ab <sub>2</sub> -CeO <sub>2</sub> @SiO <sub>2</sub> | ICP-MS                     | 0.001–5                                | 3.6×10 <sup>-4</sup>          | 10           |
| Ab <sub>1</sub> -CEA-Ab <sub>2</sub> -Cy3                                                                | LIF                        | 0.3–100                                | 0.01                          | 11           |
| Ab <sub>1</sub> -CEA-Ab <sub>2</sub> -Au NPs                                                             | Love wave                  | 0.01~10                                | 0.004                         | 12           |
| Ab <sub>1</sub> -CEA-Ab <sub>2</sub> -Dynabeads                                                          | MI                         | 0.001–10                               | 0.001                         | 13           |
| ZnO-Ab <sub>1</sub> -CEA-Ab <sub>2</sub> - CdS@Cu <sub>2</sub> O                                         | PEC                        | 0.001– 80                              | 4×10 <sup>-4</sup>            | 14           |
| Ab <sub>1</sub> -CEA-Ab <sub>2</sub> -Au NPs                                                             | SAW                        | 1–16                                   | 1                             | 15           |
| Ab <sub>1</sub> -CEA-Ab <sub>2</sub> -Au NPs                                                             | SPR                        | 1–60                                   | 1                             | 16           |
| MB-Ab <sub>1</sub> -CEA -Ab <sub>2</sub> -Eu <sup>3+</sup>                                               | TRFIA                      | 1–1000                                 | 0.5                           | 17           |
| Ab <sub>1</sub> -CEA-Ab <sub>2</sub> -CuS NPs                                                            | Smartphone<br>fluorescence | 1×10 <sup>-4</sup> ~0.001              | 5×10 <sup>-5</sup>            | This<br>work |

\* Apt.: aptamer, GO: graphene oxide, MB: magnetic beads, QBs: quantum dot nanobeads.

\*\* CI: contactless impedance, DLS: dynamic light scattering, EC: electrochemistry, ECL, electrochemiluminescence, EIS: electrochemical impedance spectroscopy, ICP-MS: inductively coupled plasma-mass spectrometry, ICTS: immunochromatographic test strip, LIF: laser-induced fluorescence, MI: magnetoimpedance, PEC: photoelectrochemical, SAW :surface acoustic wave, SPR: surface plasmon resonance, TRFIA: time-resolved fluoroimmunoassay.

## References

- 1 Y. Jin, H.J. Mao, Q.H. Jin and J.L. Zhao, *Anal. Methods* , 2016, **8**, 4861–4866.
- 2 X. Miao, S. Zou, H. Zhang and L. Ling, *Sens. Actuators B*, 2014, **191**, 396-400.
- 3 H. Quan, C. Zuo, T. Li, Y. Liu, M. Li, M. Zhong, Y. Zhang, H. Qi and M. Yang, *Electrochim. Acta*, 2015, **176**, 893-897.
- 4 J. Liu, J. Wang, T. Wang, D. Li, F. Xi, J. Wang and E. Wang, *Biosens. Bioelectron* , 2015, **65**, 281-286.
- 5 L. Wu, Y.F. Hu, Y.H. Sha, W.R. Li, T.T. Yan, S. Wang, X. Li, Z.Y. Guo, J. Zhou and X.R. Su, *Talanta* ,2016, **160**, 247–255.
- 6 D. Wang, Y. Li, Z. Lin, B. Qiu and L. Guo, *Anal. Chem*, 2015, **87**, 5966-5972.
- 7 H. Zeng, D. A. Y. Agyapong, C. Li, R. Zhao, H. Yang, C. Wu, Y. Jiang and Y. Liu, *Sens. Actuators B*, 2015, **221**, 22-27.
- 8 J. Zhu, J.-F. Wang, J.-J. Li and J.W. Zhao, *Sens. Actuators B*, 2016, **233**, 214-222.
- 9 K. Xiao, K. Wang, W. Qin, Y. Hou, W. Lu, H. Xu, Y. Wo and D. Cui, *Talanta*, 2017, **164**, 463-469.
- 10 H. W. Choi, K. H. Lee, N. H. Hur and H. B. Lim, *Anal. Chim. Acta*, 2014, **847**, 10-15.
- 11 Q. Yu, X. Zhan, K. Liu, H. Lv and Y. Duan, *Anal. Chem*, 2013, **85**, 4578-4585.
- 12 S. Li, Y. Wan, Y. Su, C. Fan and V. R. Bhethanabotla, *Biosens. Bioelectron*, 2017, **95**, 48-54.
- 13 T. Wang, L. Guo, C. Lei and Y. Zhou, *RSC Adv.* (2015, **5**,51330–51336.
- 14 H. Yang, G. Sun, L. Zhang, Y. Zhang, X. Song, J. Yu and S. Ge, *Sens. Actuators B*, 2016, **234**, 658-666.
- 15 X. Zhang, Y. Zou, C. An, K. Ying, X. Chen and P. Wang, *Sens. Actuators B*, 2015, **217**, 100-106.
- 16 R. Li, F. Feng, Z. Z. Chen, Y. F. Bai, F. F. Guo, F. Y. Wu and G. Zhou, *Talanta*, 2015, **140**, 143-149.
- 17 J. Y. Hou, T. C. Liu, G. F. Lin, Z. X. Li, L. P. Zou, M. Li and Y. S. Wu, *Anal. Chim. Acta*, 2012, **734**, 93-98.
